# Supplementary material
Source: publisher figshare collection journal article supplement (https://acs.figshare.com/ndownloader/files/4419712)
Supplement: Supplementary file 1 [file 4419712]

# Monitoring N719-dye Configurations on (1x $n$ )-Reconstructed Anatase (100) by means of STM: Reversible Configurational Changes upon illumination

Marcelo Zuleta,<sup>a,b\*</sup> Shun Yu<sup>b</sup>, Sareh Ahmadi<sup>b</sup>, Gerrit Boschloo<sup>a</sup>, Mats Göthelid<sup>b</sup>

and Anders Hagfeldt<sup>a</sup>

*a) Institution for Physical & Analytical Chemistry, Uppsala University (UU), The Ångström laboratory, Box 259, SE-751 05 Uppsala, Sweden, and b) Materials Physics, ICT, The Royal Institute of Technology (KTH), Electrum 229, SE-164 40 Stockholm, Sweden*

*Email: [marcelo.zuleta@fki.uu.se](mailto:marcelo.zuleta@fki.uu.se)*

## Supplementary Information

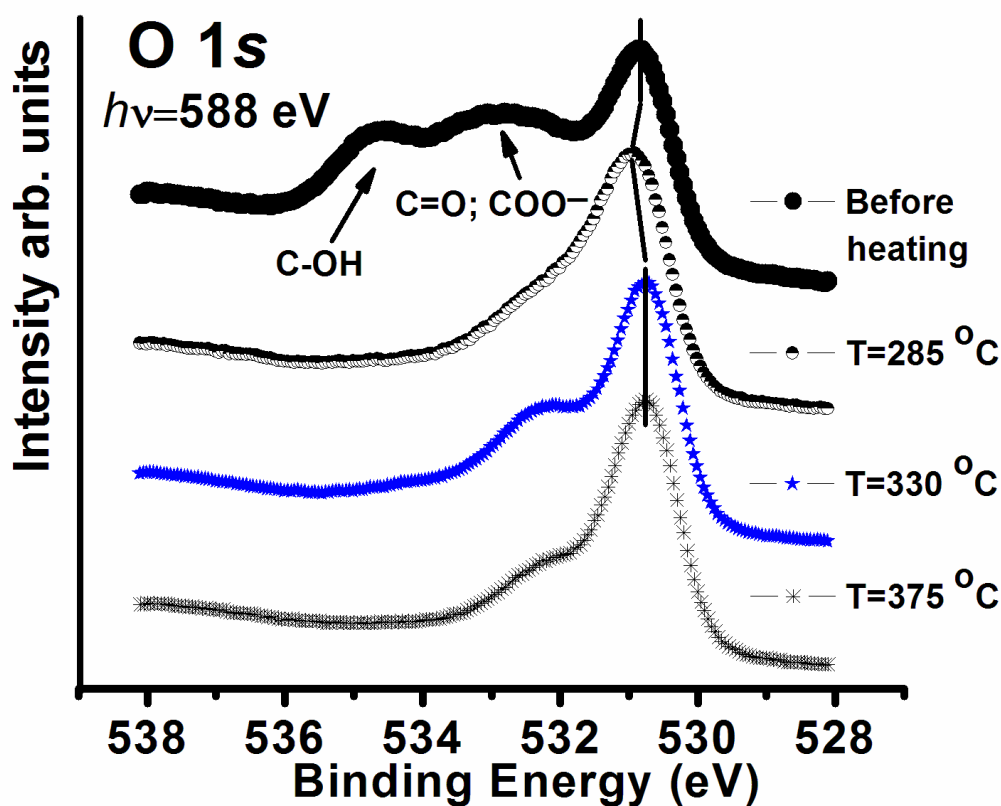

**Fig. S1** O 1s photoelectron data. The spectra were normalized against the main peak signal.

As observed, the peaks associated with COO<sup>-</sup> at 532.8 eV and C-OH at 534.6 eV, decrease in intensity relative to the main peak after the heating. The main peak is associated with the oxygen in the TiO<sub>2</sub>, and its intensity increases after heating. The relation between the intensity of the main peak after and before heating is around 1.7 for T= 285 °C and T=330 °C, and approximately 2.0 for T=375 °C. This peak is shifted 0.13 eV to higher binding energy for T=285 °C, but shifts to lower binding energy at higher annealing temperature.

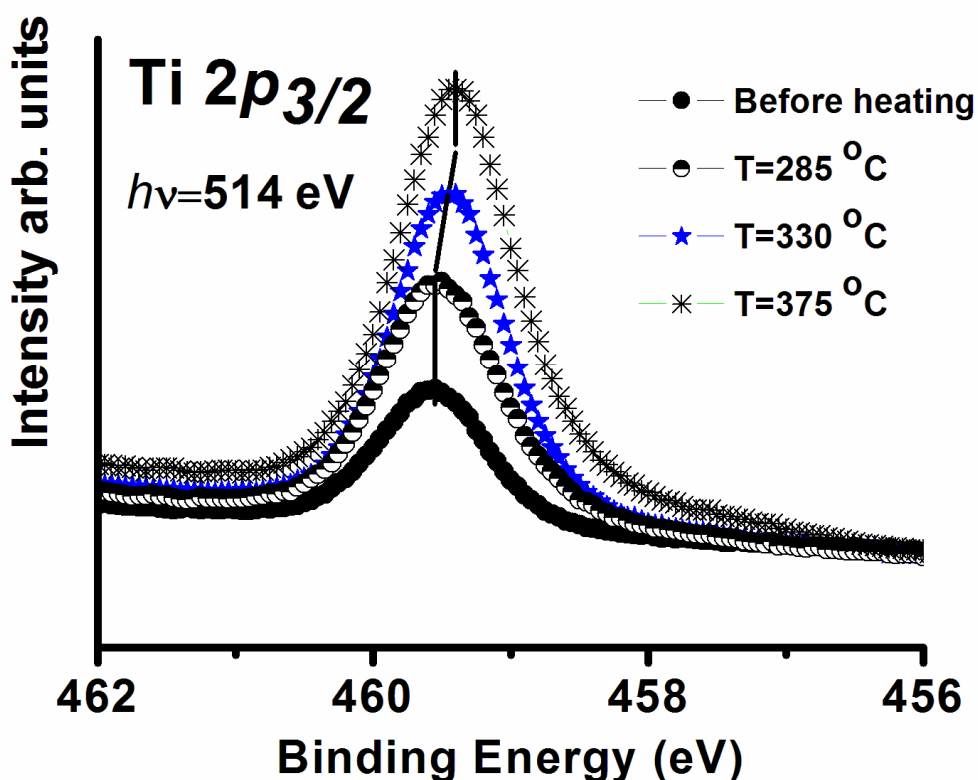

**Fig. S2** Ti 2p photoelectron data. The Ti 2p<sub>3/2</sub> spectra are shown using the relative intensities.

A shift of 0.13 eV, to lower binding energy, is observed at T= 330 °C and T= 375 °C, in contrast to the peak related to heating at T=285 °C. In addition, a comparison of the peak areas (calculated as the full width at half maximum, FWHM) before heating and after heating at T= 285 °C reveals that the increase in area of Ti 2p is around 34 %, a value in good agreement with the calculated decrease in area of C 1s at the same temperature (see Fig. 8 in the manuscript). The decrease in area for C 1s is related, in turn, to the amount of desorbed TBA<sup>+</sup>. The desorption of TBA<sup>+</sup> does not affect the Ti 2p<sub>3/2</sub> peak position since TBA<sup>+</sup> is supposed to be physisorbed and not bonded to the TiO<sub>2</sub> surface as the dye does. The calculated areas for Ti 2p corresponding to T= 330 °C and T= 375 °C are, on the other hand, larger than what would be calculated amount of TBA<sup>+</sup>, and a shift is observed (see Fig. S1). The most plausible explanation is that decomposition and desorption of the ruthenium complex is taking place in these cases.
